# Supplementary material for: Synthesis, crystal structures and luminescence properties of lanthanide oxalatophosphonates with a three-dimensional framework structure
Source: Royal Society of Chemistry journal article supplement (doi:10.1039/b814400a), 2008-11-14
Supplement: b814400a.pdf [file b814400a.pdf]

# **Synthesis, crystal structure and luminescence property of lanthanide oxalatophosphonates with a three-dimensional framework structure**

Yanyu Zhu, Zhengang Sun,\* Yan Zhao, Jing Zhang, Xin Lu, Na Zhang, Lei Liu and Fei Tong

*Institute of Chemistry for Functionalized Materials, Faculty of Chemistry and Chemical Engineering,  
Liaoning Normal University, Dalian 116029, P. R. China*

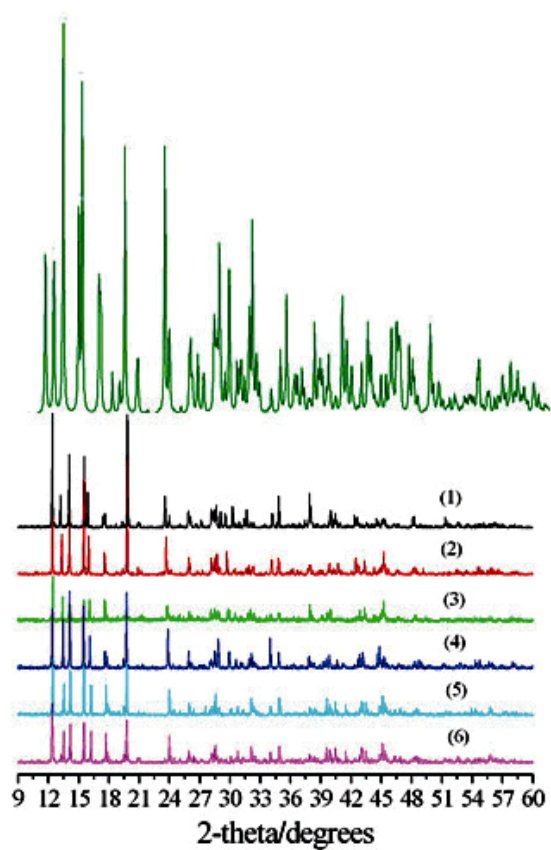

Fig. S1 The simulated XRD pattern of compound 1 (up) and the experimental powder XRD patterns of compounds 1–6 (down).

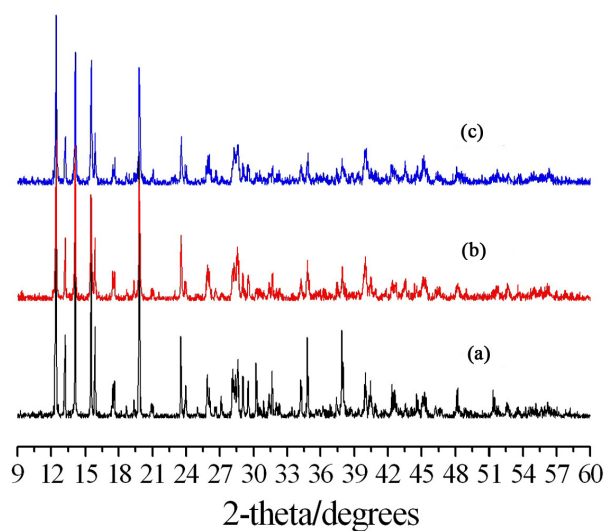

Fig. S2 The experimental powder XRD pattern of compound 1 (a), dehydrated sample after calcination at 150 °C (b), 180 °C (c).

**Table S1** Selected bond lengths (Å) for compounds **1–6**

|                           | <b>1 (La)</b> | <b>2 (Ce)</b> | <b>3 (Pr)</b> | <b>4 (Nd)</b> | <b>5 (Sm)</b> | <b>6 (Eu)</b> |
|---------------------------|---------------|---------------|---------------|---------------|---------------|---------------|
| Ln(1)–O(3)#1 <sup>a</sup> | 2.415(2)      | 2.389(3)      | 2.372(3)      | 2.360(3)      | 2.336(3)      | 2.330(3)      |
| Ln(1)–O(2)                | 2.515(2)      | 2.492(3)      | 2.481(3)      | 2.471(3)      | 2.449(4)      | 2.439(3)      |
| Ln(1)–O(7)                | 2.535(3)      | 2.510(3)      | 2.493(3)      | 2.476(3)      | 2.454(4)      | 2.449(3)      |
| Ln(1)–O(6)#2              | 2.557(2)      | 2.538(3)      | 2.522(3)      | 2.504(3)      | 2.485(3)      | 2.480(3)      |
| Ln(1)–O(5)                | 2.587(2)      | 2.574(3)      | 2.559(3)      | 2.545(3)      | 2.521(3)      | 2.518(3)      |
| Ln(1)–O(9)                | 2.594(3)      | 2.562(3)      | 2.537(4)      | 2.520(4)      | 2.484(5)      | 2.476(3)      |
| Ln(1)–O(8)#3              | 2.599(2)      | 2.580(3)      | 2.571(3)      | 2.557(3)      | 2.542(4)      | 2.537(3)      |
| Ln(1)–O(10)               | 2.609(3)      | 2.571(3)      | 2.542(4)      | 2.523(4)      | 2.485(4)      | 2.472(3)      |
| Ln(1)–O(4)#2              | 2.610(2)      | 2.595(3)      | 2.573(3)      | 2.563(3)      | 2.544(3)      | 2.542(3)      |

<sup>a</sup> Symmetry transformations used to generate equivalent atoms: #1  $-x + 2, -y, -z + 2$ ; #2  $-x + 2, y + 1/2, -z + 3/2$ ; #3  $-x + 1, -y, -z + 1$ .

**Table S2** Selected angles (°) for compounds **1–6**

|                                | <b>1 (La)</b> | <b>2 (Ce)</b> | <b>3 (Pr)</b> | <b>4 (Nd)</b> | <b>5 (Sm)</b> | <b>6 (Eu)</b> |
|--------------------------------|---------------|---------------|---------------|---------------|---------------|---------------|
| O(2)–Ln(1)–O(3)#1 <sup>a</sup> | 74.39(8)      | 74.69(9)      | 74.73(11)     | 74.73(11)     | 74.78(12)     | 74.73(10)     |
| O(7)–Ln(1)–O(3)#1              | 134.77(8)     | 134.80(9)     | 134.96(11)    | 135.08(11)    | 135.31(12)    | 135.34(10)    |
| O(2)–Ln(1)–O(7)                | 140.07(8)     | 139.07(9)     | 138.41(11)    | 138.14(11)    | 137.81(12)    | 137.73(10)    |
| O(3)#1–Ln(1)–O(6)#2            | 83.68(8)      | 84.57(9)      | 84.84(11)     | 85.16(10)     | 85.22(12)     | 85.33(9)      |
| O(2)–Ln(1)–O(6)#2              | 75.69(7)      | 75.10(9)      | 74.61(10)     | 74.08(10)     | 73.51(12)     | 73.34(9)      |
| O(7)–Ln(1)–O(6)#2              | 125.53(8)     | 126.09(9)     | 126.65(11)    | 126.87(10)    | 127.17(12)    | 127.28(9)     |
| O(3)#1–Ln(1)–O(5)              | 95.40(9)      | 95.35(10)     | 95.17(12)     | 94.99(11)     | 94.97(13)     | 94.87(10)     |
| O(2)–Ln(1)–O(5)                | 71.43(7)      | 71.48(8)      | 71.74(11)     | 71.91(10)     | 72.08(12)     | 72.15(9)      |
| O(7)–Ln(1)–O(5)                | 78.11(8)      | 77.15(9)      | 76.40(11)     | 76.14(10)     | 75.85(12)     | 75.73(10)     |
| O(6)#2–Ln(1)–O(5)              | 146.03(8)     | 145.28(9)     | 145.04(12)    | 144.63(11)    | 144.22(13)    | 144.10(10)    |
| O(3)#1–Ln(1)–O(9)              | 142.17(9)     | 142.47(10)    | 142.45(12)    | 142.41(12)    | 142.52(14)    | 142.57(11)    |
| O(2)–Ln(1)–O(9)                | 68.21(8)      | 67.98(10)     | 67.83(11)     | 67.73(11)     | 67.77(13)     | 67.85(10)     |
| O(7)–Ln(1)–O(9)                | 80.96(9)      | 79.89(10)     | 79.20(12)     | 78.74(12)     | 78.11(13)     | 77.83(10)     |
| O(6)#2–Ln(1)–O(9)              | 81.90(9)      | 82.32(10)     | 82.73(13)     | 82.89(12)     | 83.11(14)     | 83.32(11)     |
| O(5)–Ln(1)–O(9)                | 78.27(9)      | 76.79(10)     | 76.14(12)     | 75.58(12)     | 75.13(14)     | 74.87(11)     |
| O(3)#1–Ln(1)–O(8)#3            | 72.58(8)      | 71.85(9)      | 71.61(10)     | 71.28(10)     | 70.88(12)     | 70.85(9)      |
| O(2)–Ln(1)–O(8)#3              | 126.02(8)     | 126.40(9)     | 126.70(11)    | 126.87(10)    | 126.91(12)    | 127.13(10)    |
| O(7)–Ln(1)–O(8)#3              | 62.98(8)      | 63.46(9)      | 63.71(10)     | 64.08(10)     | 64.66(11)     | 64.68(9)      |
| O(6)#2–Ln(1)–O(8)#3            | 139.23(8)     | 139.41(10)    | 139.46(11)    | 139.60(11)    | 139.63(13)    | 139.56(10)    |
| O(5)–Ln(1)–O(8)#3              | 70.60(8)      | 71.36(10)     | 71.53(12)     | 71.76(12)     | 71.98(13)     | 72.18(11)     |
| O(9)–Ln(1)–O(8)#3              | 135.96(9)     | 135.49(10)    | 135.15(12)    | 135.00(12)    | 134.93(14)    | 134.76(11)    |
| O(3)#1–Ln(1)–O(10)             | 75.04(9)      | 75.68(10)     | 76.10(12)     | 76.26(12)     | 76.58(14)     | 76.72(11)     |
| O(2)–Ln(1)–O(10)               | 138.18(9)     | 138.37(11)    | 138.25(12)    | 137.96(12)    | 137.90(14)    | 137.88(12)    |
| O(7)–Ln(1)–O(10)               | 81.51(9)      | 82.24(11)     | 82.97(13)     | 83.46(13)     | 83.76(14)     | 83.85(12)     |
| O(6)#2–Ln(1)–O(10)             | 73.19(9)      | 73.59(11)     | 73.61(13)     | 73.76(13)     | 73.95(15)     | 74.08(12)     |
| O(5)–Ln(1)–O(10)               | 139.47(9)     | 140.09(11)    | 140.38(13)    | 140.66(13)    | 140.93(15)    | 140.93(12)    |
| O(9)–Ln(1)–O(10)               | 132.27(9)     | 132.49(10)    | 132.61(13)    | 132.88(12)    | 132.78(14)    | 132.87(11)    |
| O(8)#3–Ln(1)–O(10)             | 68.96(10)     | 68.89(11)     | 69.03(14)     | 69.09(13)     | 69.21(15)     | 69.01(12)     |
| O(3)#1–Ln(1)–O(4)#2            | 134.41(8)     | 135.64(9)     | 136.25(11)    | 136.76(10)    | 137.15(13)    | 137.31(9)     |
| O(2)–Ln(1)–O(4)#2              | 117.96(7)     | 117.50(9)     | 117.27(10)    | 117.02(10)    | 116.85(12)    | 116.89(9)     |
| O(7)–Ln(1)–O(4)#2              | 65.21(7)      | 65.21(8)      | 65.32(10)     | 65.23(10)     | 65.04(12)     | 64.99(9)      |
| O(6)#2–Ln(1)–O(4)#2            | 60.76(7)      | 61.20(8)      | 61.58(10)     | 61.83(9)      | 62.29(11)     | 62.43(9)      |
| O(5)–Ln(1)–O(4)#2              | 130.11(8)     | 128.93(9)     | 128.51(11)    | 128.18(10)    | 127.80(12)    | 127.73(9)     |
| O(9)–Ln(1)–O(4)#2              | 64.06(8)      | 64.08(9)      | 64.28(11)     | 64.40(11)     | 64.39(13)     | 64.54(10)     |
| O(8)#3–Ln(1)–O(4)#2            | 115.73(7)     | 115.78(9)     | 115.71(10)    | 115.80(10)    | 115.94(12)    | 115.70(10)    |
| O(10)–Ln(1)–O(4)#2             | 68.27(9)      | 68.44(10)     | 68.36(12)     | 68.51(11)     | 68.41(13)     | 68.35(11)     |

<sup>a</sup> Symmetry transformations used to generate equivalent atoms: #1  $-x + 2, -y, -z + 2$ ; #2  $-x + 2, y + 1/2, -z + 3/2$ ; #3  $-x + 1, -y, -z + 1$ .
